# Supplementary material
Source: PubMed Central journal article supplement (PMC5646667)
Supplement: NIHMS908699-supplement-supplement_1.pdf [file NIHMS908699-supplement-supplement_1.pdf]

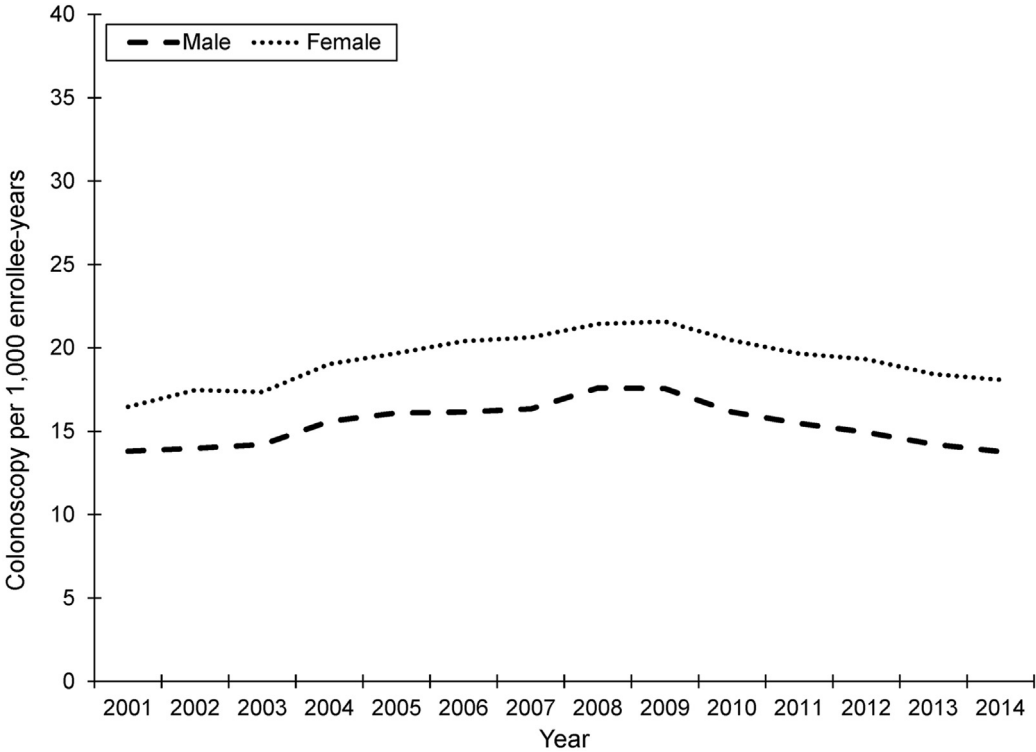

Supplementary Figure 1. Colonoscopies performed per 1000 enrollee-years by sex, MarketScan Commercial Claims and Encounters Data, 2001–2014.

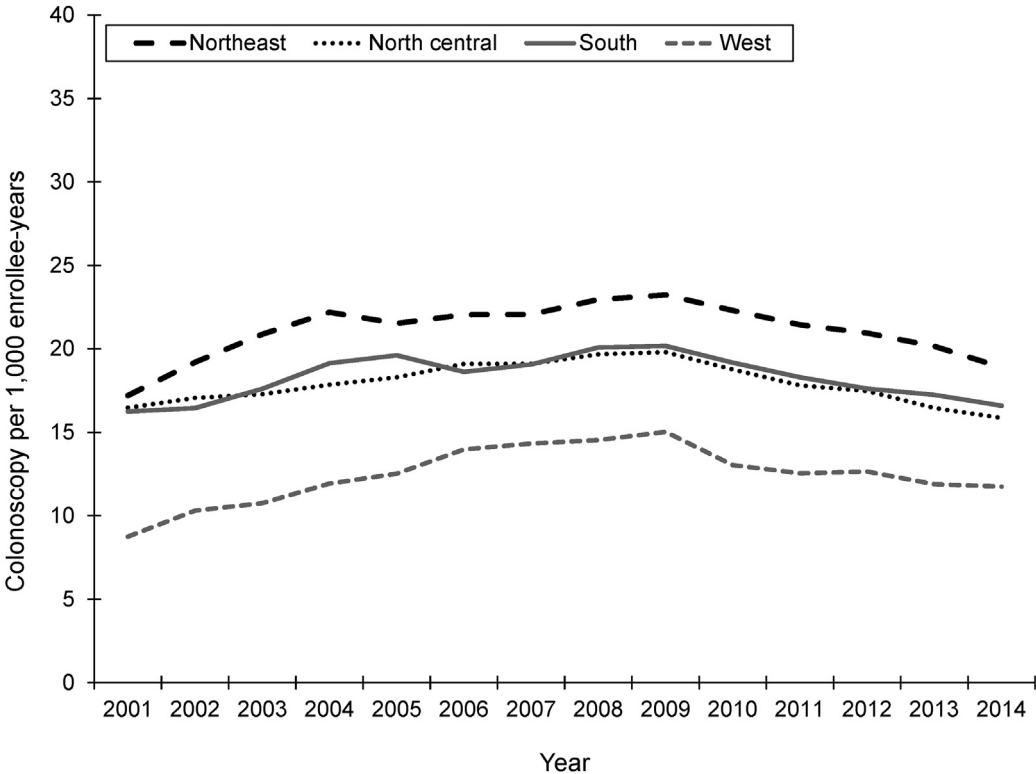

Supplementary Figure 2. Colonoscopies performed per 1000 enrollee-years by geographic region, MarketScan Commercial Claims and Encounters Data, 2001–2014.

**Supplementary Table 1.** Number of Colonoscopies Performed (in Thousands), Enrollee-years<sup>a</sup> (in Thousands), and Colonoscopy Rate per 1000 Enrollee-years, Overall and by Sex, 10-year Age Group, and Geographic Region

|                | Calendar Year |        |        |        |        |          |          |          |          |          |          |          |          |          |
|----------------|---------------|--------|--------|--------|--------|----------|----------|----------|----------|----------|----------|----------|----------|----------|
|                | 2001          | 2002   | 2003   | 2004   | 2005   | 2006     | 2007     | 2008     | 2009     | 2010     | 2011     | 2012     | 2013     | 2014     |
| Overall        |               |        |        |        |        |          |          |          |          |          |          |          |          |          |
| COL            | 35.0          | 70.8   | 109.7  | 156.4  | 178.7  | 207.9    | 208.3    | 31.7     | 310.6    | 326.0    | 358.6    | 359.0    | 281.9    | 297.1    |
| Enrollee-years | 2295.7        | 4468.8 | 6904.5 | 8976.3 | 9930.0 | 11,310.6 | 11,206.4 | 16,149.0 | 15,786.3 | 17,709.9 | 20,324.0 | 20,871.5 | 17,182.5 | 18,549.7 |
| Rate           | 15.2          | 15.8   | 15.9   | 17.4   | 18.0   | 18.4     | 18.6     | 19.6     | 19.7     | 18.4     | 17.6     | 17.2     | 16.4     | 16.0     |
| Male           |               |        |        |        |        |          |          |          |          |          |          |          |          |          |
| COL            | 14.7          | 29.0   | 45.8   | 65.2   | 74.8   | 86.8     | 87.0     | 134.6    | 130.7    | 136.0    | 150.9    | 150.6    | 117.0    | 122.8    |
| Enrollee-years | 1063.9        | 2076.4 | 3221.2 | 4188.0 | 4650.7 | 5374.5   | 5326.1   | 7650.8   | 7444.3   | 8420.6   | 9756.9   | 10,079.4 | 8230.1   | 8908.1   |
| Rate           | 13.8          | 14.0   | 14.2   | 15.6   | 16.1   | 16.2     | 16.3     | 17.6     | 17.6     | 16.2     | 15.5     | 14.9     | 14.2     | 13.8     |
| Female         |               |        |        |        |        |          |          |          |          |          |          |          |          |          |
| COL            | 20.3          | 41.8   | 63.9   | 91.1   | 103.9  | 121.1    | 121.2    | 182.1    | 179.9    | 189.9    | 207.7    | 208.4    | 164.9    | 174.3    |
| Enrollee-years | 1231.9        | 2392.4 | 3683.3 | 4788.3 | 5279.2 | 5936.1   | 5880.4   | 8498.3   | 8342.0   | 9289.3   | 10,567.0 | 10,792.1 | 8952.4   | 9641.5   |
| Rate           | 16.5          | 17.5   | 17.4   | 19.0   | 19.7   | 20.4     | 20.6     | 21.4     | 21.6     | 20.4     | 19.7     | 19.3     | 18.4     | 18.1     |
| 20-29 years    |               |        |        |        |        |          |          |          |          |          |          |          |          |          |
| COL            | 2.6           | 6.2    | 9.6    | 14.7   | 17.1   | 20.8     | 21.6     | 34.7     | 35.4     | 37.3     | 46.5     | 49.1     | 38.5     | 42.3     |
| Enrollee-years | 569.6         | 1158.3 | 1753.5 | 2290.8 | 2551.4 | 2971.5   | 3006.4   | 4415.1   | 4323.5   | 4776.1   | 6012.4   | 6446.9   | 5413.9   | 5966.5   |
| Rate           | 4.6           | 5.3    | 5.5    | 6.4    | 6.7    | 7.0      | 7.2      | 7.9      | 8.2      | 7.8      | 7.7      | 7.6      | 7.1      | 7.1      |
| 30-39 years    |               |        |        |        |        |          |          |          |          |          |          |          |          |          |
| COL            | 7.6           | 16.5   | 25.4   | 36.2   | 41.2   | 48.6     | 48.9     | 75.6     | 75.3     | 79.8     | 86.5     | 87.9     | 68.2     | 73.7     |
| Enrollee-years | 733.8         | 1495.0 | 2330.3 | 2985.3 | 3296.1 | 3736.8   | 3692.9   | 5350.1   | 5243.4   | 5918.5   | 6521.0   | 6603.8   | 5408.1   | 5852.5   |
| Rate           | 10.4          | 11.0   | 10.9   | 12.1   | 12.5   | 13.0     | 13.2     | 14.1     | 14.4     | 13.5     | 13.3     | 13.3     | 12.6     | 12.6     |
| 40-49 years    |               |        |        |        |        |          |          |          |          |          |          |          |          |          |
| COL            | 24.8          | 48.2   | 74.7   | 105.5  | 120.4  | 138.6    | 137.7    | 206.4    | 199.9    | 208.9    | 225.6    | 222.0    | 175.3    | 181.2    |
| Enrollee-years | 992.3         | 1815.5 | 2820.7 | 3700.2 | 4082.5 | 4602.3   | 4507.1   | 6383.8   | 6219.3   | 7015.3   | 7790.5   | 7820.8   | 6360.5   | 6730.6   |
| Rate           | 25.0          | 26.5   | 26.5   | 28.5   | 29.5   | 30.1     | 30.6     | 32.3     | 32.1     | 29.8     | 29.0     | 28.4     | 27.6     | 26.9     |
| Northeast      |               |        |        |        |        |          |          |          |          |          |          |          |          |          |
| COL            | 320.0         | 422.1  | 648.2  | 776.7  | 946.0  | 1073.4   | 969.6    | 2533.5   | 2063.8   | 2681.6   | 3631.1   | 3715.4   | 3213.2   | 3989.9   |
| Enrollee-years | 5.5           | 8.1    | 13.5   | 17.2   | 20.4   | 23.7     | 21.4     | 58.2     | 48.0     | 59.8     | 77.8     | 77.8     | 64.7     | 75.4     |
| Rate           | 17.2          | 19.2   | 20.9   | 22.2   | 21.5   | 22.0     | 22.1     | 23.0     | 23.2     | 22.3     | 21.4     | 20.9     | 20.2     | 18.9     |
| North central  |               |        |        |        |        |          |          |          |          |          |          |          |          |          |
| COL            | 10.8          | 19.6   | 24.9   | 32.1   | 37.7   | 59.8     | 58.9     | 77.8     | 80.6     | 80.2     | 83.7     | 83.8     | 58.8     | 58.0     |
| Enrollee-years | 632.3         | 1133.0 | 1393.6 | 1755.0 | 1976.5 | 3128.5   | 3083.9   | 3954.0   | 4069.1   | 4274.5   | 4699.7   | 4794.4   | 3570.2   | 3656.4   |
| Rate           | 17.1          | 17.3   | 17.8   | 18.3   | 19.1   | 19.1     | 19.1     | 19.7     | 19.8     | 18.8     | 17.8     | 17.5     | 16.5     | 15.9     |
| West           |               |        |        |        |        |          |          |          |          |          |          |          |          |          |
| COL            | 15.0          | 34.8   | 48.4   | 78.1   | 88.8   | 98.8     | 101.6    | 145.8    | 145.9    | 136.1    | 137.4    | 134.8    | 102.6    | 112.1    |
| Enrollee-years | 925.4         | 2116.3 | 2750.0 | 4079.7 | 4528.3 | 5304.4   | 5328.9   | 7260.7   | 7233.8   | 7097.0   | 7509.3   | 7654.5   | 5953.7   | 6754.4   |
| Rate           | 16.3          | 16.4   | 17.6   | 19.1   | 19.6   | 18.6     | 19.1     | 20.1     | 20.2     | 19.2     | 18.3     | 17.6     | 17.2     | 16.6     |

**Supplementary Table 1.** Continued

|                | Calendar Year |       |        |        |        |        |        |        |        |        |        |        |        |        |
|----------------|---------------|-------|--------|--------|--------|--------|--------|--------|--------|--------|--------|--------|--------|--------|
|                | 2001          | 2002  | 2003   | 2004   | 2005   | 2006   | 2007   | 2008   | 2009   | 2010   | 2011   | 2012   | 2013   | 2014   |
| South          |               |       |        |        |        |        |        |        |        |        |        |        |        |        |
| COL            | 3.6           | 8.1   | 22.1   | 26.9   | 29.9   | 24.1   | 25.5   | 33.9   | 35.6   | 46.8   | 48.3   | 54.3   | 47.7   | 44.0   |
| Enrollee-years | 414.9         | 785.1 | 2056.8 | 2254.8 | 2385.3 | 1723.5 | 1776.9 | 2332.8 | 2368.3 | 3587.8 | 3847.6 | 4290.2 | 4009.0 | 3742.0 |
| Rate           | 8.8           | 10.3  | 10.8   | 11.9   | 12.5   | 14.0   | 14.3   | 14.5   | 15.0   | 13.0   | 12.5   | 12.7   | 11.9   | 11.8   |

COL, colonoscopy.

<sup>a</sup>We summed the total number of months that individuals aged 20-49 were enrolled in their insurance plan in each calendar year. For example, patients who were enrolled for 8 months in the year 2001 (January 1, 2001 to December 31, 2001) contributed 8 months of “enrollee-time” during that year. Individual enrollee-time was counted in each calendar year without regard to enrollment in previous or subsequent years (ie, individuals could contribute enrollee-time across all calendar years).
